# Supplementary material
Source: PubMed Central journal article supplement (PMC2978632)
Supplement: supp_M110.157115_jbc.M110.157115-2.pdf [file supp_M110.157115_jbc.M110.157115-2.pdf]

**Supplemental Table 1**

| Gene  | Forward Primer              | Reverse Primer                |
|-------|-----------------------------|-------------------------------|
| ALP   | GTG GGC ATT GTG ACT ACC     | GGT GGC ATC TCG TTA TCC       |
| BSP   | TGG AGA CGG CGA TAG TTC     | GAG AGT GTG GAA AGT GTG G     |
| GAPDH | TTC AAC GGC ACA GTC AAG G   | TCT CGC TCC TGG AAG ATG G     |
| ITPKA | ACC GCC TAC AGC AGA TCC     | CCA CAC ACC AGC ACG ATG       |
| MMP13 | CTG GTC TTC TGG CAC ACG     | TGG GCA GCA ACA ATA AAC AAG   |
| OCN   | TCT CTC TGC TCA CTC TGA     | GTC TGT TCA CTA CCT TAT TGC   |
| OPN   | AAC TCT TCC AAG CAA TTC C   | TCT CAT CAG ACT CAT CCG       |
| OTN   | GCT GCT CGC CTC TAA ACC     | ATG ATG CTG GGA ACT CTC G     |
| PDIA3 | CGA TGT GTT GGA ACT GAC G   | TTC ATA CTC AGG GGC AAG C     |
| RUNX2 | CCG CCA CCA CTC ACT ACC     | GAT AGG ATG CTG ACG AAG TAC C |
| SMAD2 | CTC CTC ATC CCA TTC CTG TTC | TGC CCA CAC AAA CCT TTC C     |
| VDR   | AGG CAG GCA GAA GAG ATG AG  | AGG GAT GAT GGG TAG GTT GTG   |
| OPG   | CGC CAA CAT TTG CTT TCG     | TGC TCC CTC CTT TCA TCA       |
