# Supplementary material
Source: PubMed Central journal article supplement (PMC2978632)

Supplemental Figure 1

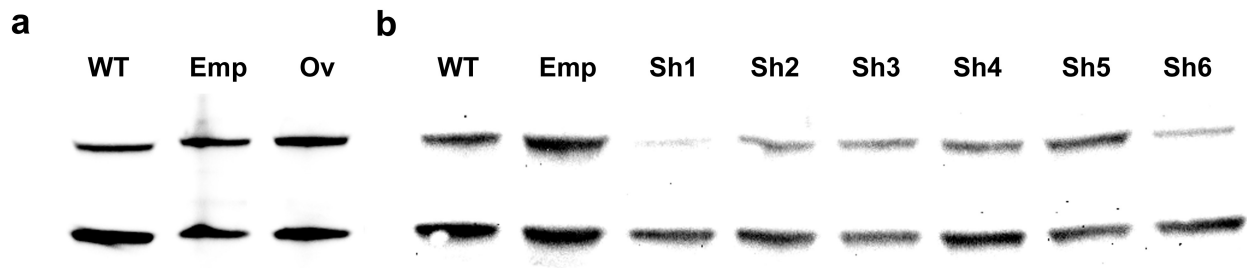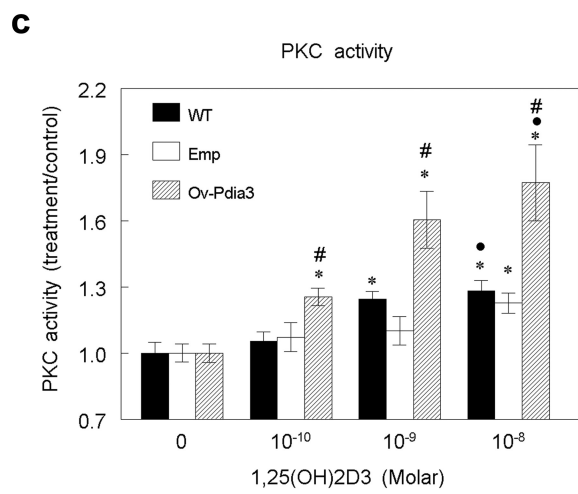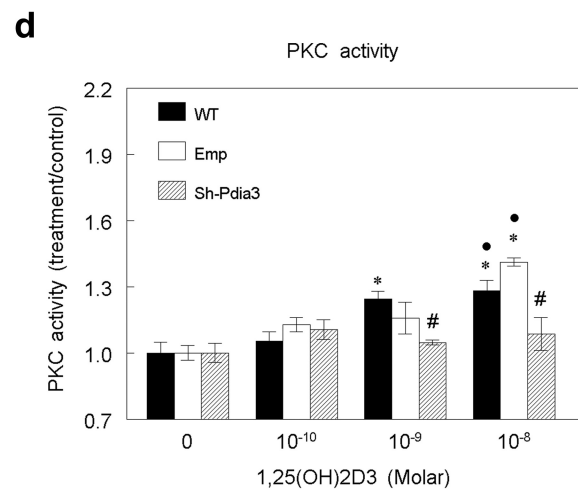

Supplement: supp_M110.157115_jbc.M110.157115-1.pdf [file supp_M110.157115_jbc.M110.157115-1.pdf]
